# Supplementary material for: Whole genome sequencing reveals that genetic conditions are frequent in intensively ill children
Source: PubMed Central journal article supplement — Intensive Care Med. 2019 Mar 7;45(5):627–36. doi: 10.1007/s00134-019-05552-x (PMC6483967; doi:10.1007/s00134-019-05552-x), 2019-03-07
Supplement: 134_2019_5552_MOESM1_ESM.pdf [file 134_2019_5552_MOESM1_ESM.pdf]

## **Supplementary Material**

|                       |         |
|-----------------------|---------|
| Supplementary Methods | page 2  |
| Supplementary Tables  | page 5  |
| Supplementary Figures | page 18 |

## Supplementary Methods

### Variant annotation and filtering

After read alignment to the human reference genome (build GRCh37) and variant calling by Illumina, single nucleotide variants (SNVs) and insertion/deletions (indels) were annotated using Ensembl's Variant Effect Predictor (VEP). They were then filtered for population frequency and for consequence (all coding variants plus non-coding variants previously reported as potentially pathogenic in the variant databases ClinVar and the Human Gene Mutation Database) [1-3]. Inheritance filtering was performed for *de novo*, homozygous, compound heterozygous and X-linked variants. Mitochondrial genome variants were analysed using the MToolBox annotation and filtering software [4]. Structural and copy number variants were filtered for overlapping a protein-coding gene and population frequency. Details of filtering parameters are below:

#### SNVs and indels

Global filter for all variants:

- gnomAD [1] allele frequency  $\leq 0.01$
- ExAC [1] allele frequency  $\leq 0.01$
- WGS10k\* allele frequency  $\leq 0.01$
- Internal cohort allele frequency  $\leq 0.05$
- Moderate or high impact on protein function [2] or found in ClinVar [3] or in HGMD (Human Gene Mutation Database)

Frequency filtering for each inheritance pattern:

Autosomal dominant *de novo*

- Allele count  $\leq 10$  in gnomAD, ExAC, WGS10k, and internal cohort

Autosomal recessive homozygous (including X for females)

Autosomal recessive compound heterozygous (including X for females and *de novo* + inherited)

- Allele frequency  $\leq 0.01$  in gnomAD, ExAC, and WGS10k
- Allele frequency  $\leq 0.02$  internal cohort
- Homozygous count  $\leq 10$  in gnomAD and ExAC

X-linked (male only)

- Hemizygous count  $\leq 10$  in gnomAD, ExAC

#### Mitochondrial genome variants

Frequency filter:

- WGS10k allele frequency  $< 0.01$  and internal cohort allele frequency  $< 0.05$

Heteroplasmy filter:

- homoplasmic OR
- $>80\%$  heteroplasmic OR
- $>5\%$  heteroplasmic AND read count  $>1000$

Consequence filter:

- Non-synonymous change OR
- MitoMap associated disease OR
- In Clinvar

\*WGS10k: ~13,000 internal controls from the NIHR-BioResource Rare Diseases research study

## SVs and CNVs

Global filter for all variants:

Pass standard Illumina quality filters  
Healthy control cohort [5] overlap<sup>‡</sup> = 0

Frequency filtering for each inheritance pattern:

Dominant filter:

WGS10k\*\* overlap frequency < 0.001  
Internal cohort overlap count < 10  
Overlap protein-coding gene  
Heterozygous

Recessive filter:

WGS10k overlap frequency < 0.01  
Internal cohort overlap frequency < 0.02  
Overlap protein-coding gene  
Homozygous OR hemizygous OR compound heterozygous with SV, CNV, or SNV/indel

<sup>‡</sup> Overlap is defined by 0.5 reciprocal overlap

\*\*WGS10k: ~9,500 internal controls from the NIHR-BioResource Rare Diseases research study

## **Phenotype comparison analysis**

Gene-associated sets of HPO terms were taken from the following file in the 2018-10-09 HPO release [6]: ALL\_SOURCES\_FREQUENT\_FEATURES\_diseases\_to\_genes\_to\_phenotypes.txt. Both proband- and gene-associated sets of HPO terms were reduced to non-redundancy with the ‘minimal\_set’ function in the ontologyX R package [7]. All sets of terms were filtered for only those belonging to the HPO class “Phenotypic abnormality” and the following terms and their descendants were filtered out: "Abnormal delivery", "Premature birth", "Prenatal maternal abnormality".

For the clustering analysis only, the term "Neonatal respiratory distress" and its descendent were also removed from the proband-associated term sets because it is very common in the NICU patients (64%). Pairwise HPO term similarity scores between the probands were calculated with the ‘get\_sim\_grid’ function (ontologyX), transformed into distances with the ‘dist’ function (method=maximim) and then the probands were hierarchically clustered with the ‘hclust’ function (fastcluster [8] R package) and split into groups with the ‘cutree’ function (h=0.75).

Enrichment of HPO terms in both the clustered proband groups and the diagnosed set of probands (compared to the entire cohort) was calculated with Fisher’s Exact test ‘fisher.test’ R function (alternative=greater). HPO term counts for each group also included the counts for the ancestors of all the terms in order to account for variable specificity of the reported terms. A multiple hypothesis testing correction was applied to each group to correct for the large number of HPO terms tested with the ‘p.adjust’ function (method=BH) and significant enrichment assessed at 0.1 false discovery rate. The HPO terms that were enriched in the set of diagnosed probands (p<0.05 but no multiple hypothesis correction), and their ancestors, were plotted with the ‘onto\_plot’ function (ontologyX).

Pairwise HPO term similarity scores between each proband and each gene for which there were HPO terms were also calculated with the ‘get\_sim\_grid’ function (ontologyX). For each diagnosed proband, the similarity scores of all the genes were sorted and the rank of the diagnosed gene was determined.

## **References**

1. Lek M, Karczewski KJ, Minikel E V, et al (2016) Analysis of protein-coding genetic variation in 60,706 humans. *Nature* 536:285–291. <https://doi.org/10.1038/nature19057>
2. Calculated consequences. [https://www.ensembl.org/info/genome/variation/prediction/predicted\\_data.html](https://www.ensembl.org/info/genome/variation/prediction/predicted_data.html). Accessed 16 Aug 2018

3. Landrum MJ, Lee JM, Benson M, et al (2018) ClinVar: improving access to variant interpretations and supporting evidence. *Nucleic Acids Res* 46:D1062–D1067. <https://doi.org/10.1093/nar/gkx1153>
4. Calabrese C, Simone D, Diroma MA, et al (2014) MToolBox: A highly automated pipeline for heteroplasmy annotation and prioritization analysis of human mitochondrial variants in high-throughput sequencing. *Bioinformatics* 30:3115–3117. <https://doi.org/10.1093/bioinformatics/btu483>
5. Zarrei M, MacDonald JR, Merico D, Scherer SW (2015) A copy number variation map of the human genome. *Nat Rev Genet* 16:172–183. <https://doi.org/10.1038/nrg3871>
6. Köhler S, Vasilevsky NA, Engelstad M, et al (2017) The Human Phenotype Ontology in 2017. *Nucleic Acids Res* 45:D865–D876. <https://doi.org/10.1093/nar/gkw1039>
7. Greene D, Richardson S, Turro E (2017) OntologyX: A suite of R packages for working with ontological data. *Bioinformatics* 33:1104–1106. <https://doi.org/10.1093/bioinformatics/btw763>
8. Müllner D (2013) **fastcluster** : Fast Hierarchical, Agglomerative Clustering Routines for *R* and *Python*. *J Stat Softw* 53:1–18. <https://doi.org/10.18637/jss.v053.i09>

## SUPPLEMENTARY TABLES

**Supplementary Table 1. Recruitment criteria**

| Criteria                                         | Inclusion |      | Exclusion |      |
|--------------------------------------------------|-----------|------|-----------|------|
|                                                  | NICU      | PICU | NICU      | PICU |
| Congenital anomalies                             | X         | X    |           |      |
| Neurological symptoms                            | X         | X    |           |      |
| Suspected metabolic disease                      | X         | X    |           |      |
| Surgical necrotizing enterocolitis (NEC)         | X         |      |           |      |
| Extreme IUGR or failure to thrive                | X         |      |           |      |
| Unexplained critical illness/clinician's request | X         | X    |           |      |
| Prematurity without additional features          |           |      | X         | X    |
| Known trisomies or other genetic diagnosis       |           |      | X         | X    |
| Trauma                                           |           |      |           | X    |
| Haematological malignancies and Oncology         |           |      |           | X    |
| Bronchiolitis/respiratory tract infections       |           |      |           | X    |

NICU: neonatal intensive care unit

PICU: paediatric intensive care unit

IUGR: intra-uterine growth retardation

**Supplementary Table 2. Patient data**

| Sample ID   | Family size | Sex | Recruitment age (postnatal days) | Age at death (postnatal days) | Recruitment ward |
|-------------|-------------|-----|----------------------------------|-------------------------------|------------------|
| NGC00001_01 | 3           | M   | 38                               | 118                           | NICU             |
| NGC00002_01 | 3           | M   | 98                               | 160                           | NICU             |
| NGC00003_01 | 3           | M   | 9                                | NA                            | NICU             |
| NGC00004_01 | 3           | F   | 11                               | NA                            | NICU             |
| NGC00005_01 | 3           | F   | 1                                | 1                             | NICU             |
| NGC00006_01 | 3           | M   | 58                               | NA                            | NICU             |
| NGC00007_01 | 1           | M   | 29                               | NA                            | NICU             |
| NGC00008_01 | 3           | F   | 33                               | NA                            | NICU             |
| NGC00009_01 | 3           | F   | 6                                | NA                            | NICU             |
| NGC00010_01 | 2           | M   | 27                               | NA                            | NICU             |
| NGC00011_01 | 3           | F   | 30                               | NA                            | NICU             |
| NGC00012_01 | 3           | F   | 4                                | NA                            | NICU             |
| NGC00013_01 | 3           | M   | 4                                | NA                            | NICU             |
| NGC00014_01 | 3           | F   | 8                                | NA                            | NICU             |
| NGC00015_01 | 3           | F   | 23                               | NA                            | NICU             |
| NGC00016_01 | 3           | F   | 4                                | NA                            | NICU             |
| NGC00017_01 | 3           | F   | 7                                | NA                            | NICU             |
| NGC00018_01 | 3           | M   | 6                                | NA                            | NICU             |
| NGC00019_01 | 3           | F   | 12                               | NA                            | NICU             |
| NGC00020_01 | 3           | F   | 25                               | NA                            | NICU             |
| NGC00021_01 | 3           | F   | 7                                | NA                            | NICU             |
| NGC00022_01 | 3           | M   | 205                              | NA                            | PICU             |
| NGC00023_01 | 4           | F   | 5211                             | NA                            | PICU             |
| NGC00023_04 | 4           | F   | 4144                             | NA                            | NA               |
| NGC00024_01 | 3           | M   | 184                              | 190                           | NICU             |
| NGC00025_01 | 3           | F   | 4                                | NA                            | NICU             |
| NGC00026_01 | 3           | M   | 13                               | NA                            | NICU             |
| NGC00027_01 | 3           | F   | 40                               | NA                            | NICU             |
| NGC00028_01 | 3           | F   | 2                                | NA                            | Postnatal Ward   |
| NGC00029_01 | 3           | F   | 4038                             | NA                            | PICU             |
| NGC00030_01 | 3           | M   | 1273                             | NA                            | PICU             |
| NGC00031_01 | 3           | M   | 5                                | 43                            | NICU             |
| NGC00032_01 | 2           | F   | 246                              | NA                            | PICU             |
| NGC00033_01 | 3           | F   | 4767                             | NA                            | PICU             |
| NGC00034_01 | 3           | F   | 221                              | NA                            | PICU             |
| NGC00035_01 | 3           | M   | 15                               | NA                            | NICU             |

|             |   |   |      |    |          |
|-------------|---|---|------|----|----------|
| NGC00036_01 | 3 | F | 85   | 85 | Genetics |
| NGC00037_01 | 2 | M | 5963 | NA | PICU     |
| NGC00038_01 | 3 | M | 6    | NA | NICU     |
| NGC00039_01 | 3 | F | 68   | NA | NICU     |
| NGC00041_01 | 3 | M | 9    | NA | NICU     |
| NGC00042_01 | 3 | F | 3    | NA | NICU     |
| NGC00043_01 | 2 | M | 1341 | NA | PICU     |
| NGC00044_01 | 2 | F | 3629 | NA | PICU     |
| NGC00045_01 | 1 | M | 5534 | NA | PICU     |
| NGC00047_01 | 3 | M | 319  | NA | PICU     |
| NGC00048_01 | 2 | M | 5574 | NA | PICU     |
| NGC00049_01 | 3 | M | 8    | NA | NICU     |
| NGC00050_01 | 3 | F | 4    | NA | NICU     |
| NGC00051_01 | 3 | F | 42   | NA | NICU     |
| NGC00052_01 | 3 | M | 5    | NA | NICU     |
| NGC00053_01 | 3 | F | 6    | NA | NICU     |
| NGC00054_01 | 3 | F | 300  | NA | PICU     |
| NGC00055_01 | 3 | M | 4    | NA | NICU     |
| NGC00056_01 | 3 | F | 2030 | NA | PICU     |
| NGC00057_01 | 3 | F | 4228 | NA | PICU     |
| NGC00058_01 | 2 | M | 21   | NA | NICU     |
| NGC00059_01 | 3 | M | 720  | NA | PICU     |
| NGC00060_01 | 1 | F | 5237 | NA | PICU     |
| NGC00061_01 | 4 | M | 190  | NA | PICU     |
| NGC00061_04 | 4 | M | 190  | NA | NA       |
| NGC00062_01 | 3 | F | 78   | NA | NICU     |
| NGC00063_01 | 3 | F | 3    | NA | NICU     |
| NGC00064_01 | 2 | F | 4693 | NA | PICU     |
| NGC00065_01 | 3 | M | 313  | NA | PICU     |
| NGC00066_01 | 3 | M | 5    | NA | NICU     |
| NGC00067_01 | 2 | M | 4164 | NA | PICU     |
| NGC00068_01 | 3 | M | 17   | NA | NICU     |
| NGC00069_01 | 3 | F | 65   | NA | PICU     |
| NGC00070_01 | 3 | M | 501  | NA | PICU     |
| NGC00071_01 | 3 | F | 1478 | NA | PICU     |
| NGC00073_01 | 3 | M | 8    | NA | NICU     |
| NGC00075_01 | 3 | F | 154  | NA | PICU     |
| NGC00076_01 | 3 | F | 22   | 53 | NICU     |
| NGC00077_01 | 3 | M | 79   | NA | NICU     |

|             |   |   |      |      |          |
|-------------|---|---|------|------|----------|
| NGC00078_01 | 3 | F | 14   | NA   | NICU     |
| NGC00079_01 | 3 | F | 4    | NA   | NICU     |
| NGC00080_01 | 3 | F | 4    | 4    | NICU     |
| NGC00081_01 | 3 | M | 141  | NA   | NICU     |
| NGC00082_01 | 3 | F | 9    | NA   | NICU     |
| NGC00083_01 | 3 | F | 4    | 8    | NICU     |
| NGC00084_01 | 2 | F | 18   | NA   | NICU     |
| NGC00085_01 | 3 | F | 9    | NA   | NICU     |
| NGC00086_01 | 3 | F | 105  | NA   | PICU     |
| NGC00087_01 | 3 | F | 1793 | NA   | PICU     |
| NGC00088_01 | 3 | M | 6135 | NA   | PICU     |
| NGC00089_01 | 2 | M | 6    | NA   | NICU     |
| NGC00090_01 | 3 | F | 167  | NA   | PICU     |
| NGC00091_01 | 3 | M | 13   | NA   | NICU     |
| NGC00092_01 | 3 | M | 25   | NA   | NICU     |
| NGC00093_01 | 2 | M | 13   | NA   | NICU     |
| NGC00094_01 | 3 | M | 1974 | NA   | PICU     |
| NGC00095_01 | 3 | F | 2309 | NA   | PICU     |
| NGC00096_01 | 3 | M | 386  | NA   | PICU     |
| NGC00097_01 | 2 | F | 8    | NA   | NICU     |
| NGC00098_01 | 3 | M | 4870 | NA   | PICU     |
| NGC00099_01 | 3 | F | 5550 | 5595 | PICU     |
| NGC00101_01 | 4 | F | 1    | 1    | NICU     |
| NGC00101_04 | 4 | M | 0    | NA   | NA       |
| NGC00102_01 | 3 | M | 42   | NA   | NICU     |
| NGC00103_01 | 3 | F | 744  | NA   | PICU     |
| NGC00104_01 | 3 | M | 745  | NA   | PICU     |
| NGC00105_01 | 3 | M | 2047 | NA   | PICU     |
| NGC00106_01 | 2 | F | 7    | NA   | NICU     |
| NGC00107_01 | 3 | M | 1716 | NA   | PICU     |
| NGC00108_01 | 3 | F | 86   | NA   | NICU     |
| NGC00109_01 | 3 | F | 275  | 275  | Genetics |
| NGC00110_01 | 3 | M | 116  | NA   | NICU     |
| NGC00111_01 | 3 | F | 3    | NA   | NICU     |
| NGC00112_01 | 3 | F | 7    | NA   | NICU     |
| NGC00113_01 | 4 | M | 51   | NA   | NICU     |
| NGC00113_04 | 4 | F | 1953 | NA   | NA       |
| NGC00114_01 | 3 | F | 89   | 89   | PICU     |
| NGC00115_01 | 3 | M | 23   | NA   | NICU     |



|             |   |   |       |    |               |
|-------------|---|---|-------|----|---------------|
| NGC00116_01 | 3 | M | 359   | NA | PICU          |
| NGC00117_01 | 5 | F | 11028 | NA | NA            |
| NGC00117_04 | 5 | F | 4     | NA | NICU          |
| NGC00118_01 | 3 | M | 14    | NA | NICU          |
| NGC00119_01 | 3 | F | 8     | NA | NICU          |
| NGC00120_01 | 3 | F | 0     | 0  | Delivery Unit |
| NGC00121_01 | 3 | F | 6     | NA | NICU          |
| NGC00122_01 | 3 | F | 627   | NA | PICU          |
| NGC00123_01 | 3 | M | 414   | NA | PICU          |
| NGC00124_01 | 3 | F | 8     | NA | NICU          |
| NGC00125_01 | 3 | M | 191   | NA | PICU          |
| NGC00126_01 | 3 | F | 166   | NA | PICU          |
| NGC00127_01 | 3 | M | 587   | NA | Neuro         |
| NGC00128_01 | 3 | M | 220   | NA | PICU          |
| NGC00129_01 | 3 | F | 81    | NA | Neuro         |
| NGC00130_01 | 3 | M | 474   | NA | Neuro         |
| NGC00131_01 | 3 | F | 131   | NA | Neuro         |
| NGC00132_01 | 3 | M | 28    | NA | NICU          |
| NGC00133_01 | 3 | M | 1227  | NA | Neuro         |
| NGC00134_01 | 3 | M | 49    | NA | NICU          |
| NGC00135_01 | 3 | F | 332   | NA | Neuro         |
| NGC00136_01 | 3 | M | 17    | NA | NICU          |
| NGC00137_01 | 3 | F | 24    | NA | NICU          |
| NGC00138_01 | 3 | M | 11    | NA | NICU          |
| NGC00139_01 | 3 | F | 962   | NA | Neuro         |
| NGC00140_01 | 3 | M | 41    | NA | PICU          |
| NGC00141_01 | 3 | M | 576   | NA | PICU          |
| NGC00142_01 | 3 | M | 14    | NA | NICU          |
| NGC00143_01 | 3 | M | 2197  | NA | PICU          |
| NGC00144_01 | 3 | M | 4     | NA | NICU          |
| NGC00145_01 | 3 | F | 4042  | NA | PICU          |
| NGC00146_01 | 3 | M | 19    | NA | NICU          |
| NGC00147_01 | 3 | F | 2225  | NA | Neuro         |
| NGC00148_01 | 3 | F | 12    | NA | NICU          |
| NGC00149_01 | 3 | M | 761   | NA | Neuro         |
| NGC00150_01 | 3 | M | 941   | NA | Neuro         |
| NGC00151_01 | 3 | M | 4     | NA | NICU          |
| NGC00152_01 | 3 | F | 8465  | NA | Neuro         |
| NGC00153_01 | 3 | F | 13    | NA | NICU          |

|             |   |   |      |    |          |
|-------------|---|---|------|----|----------|
| NGC00154_01 | 3 | F | 19   | NA | NICU     |
| NGC00155_01 | 3 | M | 106  | NA | PICU     |
| NGC00156_01 | 3 | M | 72   | NA | Genetics |
| NGC00157_01 | 3 | M | 14   | NA | NICU     |
| NGC00158_01 | 2 | M | 31   | NA | NICU     |
| NGC00159_01 | 3 | M | 8    | NA | NICU     |
| NGC00160_01 | 2 | M | 2516 | NA | PICU     |
| NGC00161_01 | 3 | F | 191  | NA | Neuro    |
| NGC00162_01 | 3 | M | 53   | NA | NICU     |
| NGC00164_01 | 3 | F | 11   | NA | NICU     |
| NGC00165_01 | 2 | M | 280  | NA | Genetics |
| NGC00166_01 | 3 | M | 327  | NA | Neuro    |
| NGC00167_01 | 3 | M | 5552 | NA | Neuro    |
| NGC00169_01 | 3 | M | 6    | NA | NICU     |
| NGC00170_01 | 3 | F | 7    | NA | NICU     |
| NGC00171_01 | 3 | F | 39   | NA | NICU     |
| NGC00172_01 | 3 | F | 15   | NA | NICU     |
| NGC00173_01 | 3 | M | 5707 | NA | PICU     |
| NGC00174_01 | 3 | F | 127  | NA | Neuro    |
| NGC00175_01 | 3 | F | 5    | NA | NICU     |
| NGC00176_01 | 3 | F | 3203 | NA | Neuro    |
| NGC00177_01 | 3 | M | 529  | NA | PICU     |
| NGC00178_01 | 3 | M | 112  | NA | Neuro    |
| NGC00179_01 | 3 | F | 18   | NA | PICU     |
| NGC00180_01 | 3 | M | 58   | NA | NICU     |
| NGC00181_01 | 3 | M | 25   | NA | NICU     |
| NGC00182_01 | 3 | M | 56   | NA | NICU     |
| NGC00183_01 | 3 | F | 899  | NA | PICU     |
| NGC00184_01 | 3 | M | 40   | NA | PICU     |
| NGC00185_01 | 3 | F | 6    | NA | NICU     |
| NGC00186_01 | 3 | M | 8    | NA | PICU     |
| NGC00187_01 | 3 | F | 10   | NA | NICU     |
| NGC00188_01 | 3 | F | 6115 | NA | Neuro    |
| NGC00189_01 | 3 | M | 1608 | NA | Neuro    |
| NGC00190_01 | 3 | M | 7    | NA | NICU     |
| NGC00191_01 | 3 | M | 1963 | NA | Neuro    |
| NGC00192_01 | 3 | M | 564  | NA | PICU     |
| NGC00193_01 | 3 | F | 137  | NA | Neuro    |
| NGC00194_01 | 3 | M | 66   | NA | NICU     |

|                    |   |   |      |    |          |
|--------------------|---|---|------|----|----------|
| <b>NGC00196_01</b> | 3 | F | 2359 | NA | Neuro    |
| <b>NGC00197_01</b> | 3 | M | 18   | NA | NICU     |
| <b>NGC00198_01</b> | 3 | F | 302  | NA | Neuro    |
| <b>NGC00199_01</b> | 2 | M | 15   | NA | NICU     |
| <b>NGC00200_01</b> | 3 | F | 1613 | NA | PICU     |
| <b>NGC00205_01</b> | 3 | F | 81   | NA | NICU     |
| <b>NGC00206_01</b> | 3 | M | 921  | NA | PICU     |
| <b>NGC00207_01</b> | 3 | M | 5647 | NA | Genetics |

NICU: neonatal intensive care unit  
 PICU: paediatric intensive care unit  
 Neuro: paediatric neurology department  
 Genetics: clinical genetics department

**Supplementary Table 3. Diagnostic rates by age and ward**

| <b>Recruited from</b> | <b>Age<sup>a</sup> range at recruitment</b> | <b>Number of probands</b> | <b>Number of diagnoses</b> | <b>Percent diagnosed</b> |
|-----------------------|---------------------------------------------|---------------------------|----------------------------|--------------------------|
| <b>NICU</b>           | 0 - 14 days                                 | 62                        | 10                         | 16%                      |
|                       | 14 days – 6 months                          | 44                        | 4                          | 9%                       |
| <b>PICU</b>           | 8 days – 2 years                            | 29                        | 7                          | 24%                      |
|                       | 2 years – 16 years                          | 32                        | 8                          | 25%                      |
| <b>Neuro/Genetics</b> | 80 days - 2 years                           | 15                        | 7                          | 47%                      |
|                       | 2 years – 23 years                          | 13                        | 4                          | 31%                      |

NICU: neonatal intensive care unit  
PICU: paediatric intensive care unit  
Neuro: paediatric neurology department  
Genetics: clinical genetics department  
<sup>a</sup>Postnatal age

**Supplementary Table 4. Diagnosed cases**

| Family ID | Age <sup>a</sup> | Sex | Gene           | Diagnosis [OMIM]                                    | Variant                                 |
|-----------|------------------|-----|----------------|-----------------------------------------------------|-----------------------------------------|
| 31        | 5 d              | M   | <i>MTM1</i>    | Myotubular myopathy                                 | X-linked recessive, missense            |
| 33        | 13 y             | F   | <i>BRAF</i>    | Noonan syndrome                                     | <i>de novo</i> , missense               |
| 44        | 10 y             | F   | <i>COL2A1</i>  | Spondyloepiphyseal dysplasia congenita <sup>b</sup> | <i>de novo</i> , missense               |
| 58        | 21 d             | M   | <i>CYP21A2</i> | Congenital adrenal hyperplasia                      | Homozygous, splice variant              |
| 62        | 11 w             | F   | <i>SATB2</i>   | Glass syndrome                                      | <i>de novo</i> , missense               |
| 67        | 11 y             | M   | <i>SMC1A</i>   | Cornelia de Lange syndrome                          | X-linked dominant, missense             |
| 69        | 2 m              | F   | <i>ARID1B</i>  | Coffin-Siris syndrome                               | <i>de novo</i> , deletion (16 Mb)       |
| 75        | 5 m              | F   | <i>ARID1B</i>  | Coffin-Siris syndrome                               | <i>de novo</i> , frameshift             |
| 76        | 22 d             | F   | <i>NIPBL</i>   | Cornelia de Lange syndrome                          | <i>de novo</i> , frameshift             |
| 78        | 14 d             | F   | <i>COL2A1</i>  | Kniest dysplasia                                    | <i>de novo</i> , splice site            |
| 94        | 5 y              | M   | <i>HBB</i>     | Beta thalassemia <sup>b</sup>                       | Homozygous, frameshift                  |
| 96        | 13 m             | M   | <i>ASXL3</i>   | Bainbridge-Ropers syndrome                          | <i>de novo</i> , frameshift             |
| 99        | 15 y             | F   | <i>SCN2A</i>   | Early infantile epileptic encephalopathy            | <i>de novo</i> , missense               |
| 101       | 1 d              | F   | <i>TTN</i>     | Congenital titinopathy <sup>c</sup>                 | Comp. het., frameshifts                 |
| 104       | 2 y              | M   | <i>GK</i>      | Glycerol kinase deficiency                          | X-linked recessive, missense            |
| 109       | 9 m              | F   | <i>TBCD</i>    | Early onset, progressive encephalopathy             | Comp. het., splice site + missense      |
| 111       | 3 d              | F   | 5q del         | 5q15-23 deletion <sup>d</sup>                       | <i>de novo</i> , deletion (24 Mb)       |
| 114       | 3 m              | F   | <i>NDUFA6</i>  | Mitochondrial complex I deficiency <sup>e</sup>     | Comp. het., frameshifts                 |
| 125       | 6 m              | M   | <i>TGFBR1</i>  | Loeys-Dietz syndrome                                | <i>de novo</i> , missense               |
| 126       | 5 m              | F   | <i>RHOBTB2</i> | Early infantile epileptic encephalopathy            | <i>de novo</i> , missense               |
| 127       | 20 m             | M   | <i>GFAP</i>    | Alexander disease                                   | <i>de novo</i> , missense               |
| 130       | 16 m             | M   | <i>PDHA1</i>   | Pyruvate dehydrogenase deficiency                   | <i>de novo</i> X-linked dom., missense  |
| 135       | 11 m             | F   | <i>SCN1A</i>   | Dravet syndrome                                     | <i>de novo</i> , missense               |
| 138       | 11 d             | M   | <i>DNAH11</i>  | Ciliary dyskinesia, primary                         | Comp. het., stop gain + missense        |
| 139       | 3 y              | F   | <i>ALS2</i>    | Juvenile amyotrophic lateral sclerosis              | Comp. het., splice site + frameshift    |
| 143       | 6 y              | M   | <i>PYGM</i>    | McArdle disease                                     | Comp. het., stop gain + missense        |
| 144       | 4 d              | M   | <i>NPHS2</i>   | Nephrotic syndrome, steroid-resistant               | Homozygous, missense                    |
| 147       | 6 y              | F   | <i>UBTF</i>    | Neurodegeneration, with brain atrophy               | <i>de novo</i> , missense               |
| 151       | 4 d              | M   | <i>KAT6B</i>   | Genitopatellar syndrome                             | <i>de novo</i> , frameshift             |
| 159       | 8 d              | M   | <i>FLNB</i>    | Larsen syndrome                                     | <i>de novo</i> , missense               |
| 164       | 11 d             | F   | <i>CHD7</i>    | CHARGE syndrome                                     | <i>de novo</i> , splice site            |
| 170       | 7 d              | F   | 7q del         | 7q36.3 deletion <sup>d</sup>                        | <i>de novo</i> , deletion (16 Mb)       |
| 174       | 4 m              | F   | <i>NDUFV1</i>  | Mitochondrial complex I deficiency                  | Homozygous, missense                    |
| 176       | 9 y              | F   | <i>SCN1A</i>   | Dravet syndrome                                     | <i>de novo</i> , missense               |
| 177       | 18 m             | M   | <i>PPP2R5D</i> | Mental retardation                                  | <i>de novo</i> , missense               |
| 178       | 4 m              | M   | <i>DNM1</i>    | Early infantile epileptic encephalopathy            | <i>de novo</i> , missense               |
| 191       | 5 y              | M   | <i>GNAO1</i>   | Neurodev. disorder, involun. movements              | <i>de novo</i> , in frame deletion      |
| 198       | 10 m             | F   | <i>CDKL5</i>   | Early infantile epileptic encephalopathy            | <i>de novo</i> X-linked dom., missense  |
| 205       | 3 m              | F   | <i>MAP2K1</i>  | Cardiofaciocutaneous syndrome                       | <i>de novo</i> , missense               |
| 206       | 2 y              | M   | <i>DMD</i>     | Duchenne muscular dystrophy                         | <i>de novo</i> X-linked rec., stop gain |

<sup>a</sup> Age postnatal; d: days, w: weeks, m: months, y: years

<sup>b</sup> Diagnosis only partially explains phenotype

<sup>c</sup> Not yet in OMIM, published in Oates E. C., *et al.* [Ann Neurol](#) (2018) [25]

<sup>d</sup> Specific gene not determined, multi-genic

<sup>e</sup> Not yet in OMIM, published in Alston C. L., *et al.* [Am J Hum Genet](#) (2018) [24]

**Supplementary Table 5. Pathogenic variant information**

| Sample ID   | Gene           | Pathogenicity     | Variant type | Consequence             | Inheritance                       | HGVSc                                                   |
|-------------|----------------|-------------------|--------------|-------------------------|-----------------------------------|---------------------------------------------------------|
| NGC00031_01 | <i>MTM1</i>    | likely pathogenic | SNV          | missense variant        | X-linked recessive                | ENST00000370396.2:c.1373T>C                             |
| NGC00033_01 | <i>BRAF</i>    | pathogenic        | SNV          | missense variant        | <i>de novo</i> autosomal dominant | ENST00000288602.6:c.1513C>T                             |
| NGC00044_01 | <i>COL2A1</i>  | likely pathogenic | SNV          | missense variant        | <i>de novo</i> autosomal dominant | ENST00000380518.3:c.1358G>C                             |
| NGC00058_01 | <i>CYP21A2</i> | pathogenic        | SNV          | splice variant          | autosomal recessive homozygous    | NM_000500.7:c.293-13C>G                                 |
| NGC00062_01 | <i>SATB2</i>   | likely pathogenic | SNV          | missense variant        | <i>de novo</i> autosomal dominant | ENST00000417098.1:c.1564C>T                             |
| NGC00067_01 | <i>SMC1A</i>   | vus               | SNV          | missense variant        | X-linked dominant                 | ENST00000322213.4:c.1994G>A                             |
| NGC00069_01 | <i>ARID1B</i>  | pathogenic        | complex SV   | deletion                | <i>de novo</i> autosomal dominant | chr6:154773915-171115067                                |
| NGC00075_01 | <i>ARID1B</i>  | pathogenic        | indel        | frameshift variant      | <i>de novo</i> autosomal dominant | ENST00000346085.5:c.5570_5573 delAAGA                   |
| NGC00076_01 | <i>NIPBL</i>   | pathogenic        | indel        | frameshift variant      | <i>de novo</i> autosomal dominant | ENST00000282516.8:c.6679_6682 delGTCA                   |
| NGC00078_01 | <i>COL2A1</i>  | likely pathogenic | SNV          | splice donor variant    | <i>de novo</i> autosomal dominant | ENST00000380518.3:c.1419+1G>A                           |
| NGC00094_01 | <i>HBB</i>     | pathogenic        | indel        | frameshift variant      | autosomal recessive homozygous    | ENST00000335295.4:c.17_18delCT                          |
| NGC00096_01 | <i>ASXL3</i>   | pathogenic        | indel        | frameshift variant      | <i>de novo</i> autosomal dominant | ENST00000269197.5:c.3332_3333 delTT                     |
| NGC00099_01 | <i>SCN2A</i>   | likely pathogenic | SNV          | missense variant        | <i>de novo</i> autosomal dominant | ENST00000357398.3:c.782T>G                              |
| NGC00101_01 | <i>TTN</i>     | likely pathogenic | indel        | frameshift variant      | autosomal recessive comp. het.    | ENST00000589042.1:c.104717delA                          |
| NGC00101_01 | <i>TTN</i>     | likely pathogenic | indel        | frameshift variant      | autosomal recessive comp. het.    | ENST00000589042.1:c.56330_56334 delTGAGA                |
| NGC00101_04 | <i>TTN</i>     | likely pathogenic | indel        | frameshift variant      | autosomal recessive comp. het.    | ENST00000589042.1:c.104717delA                          |
| NGC00101_04 | <i>TTN</i>     | likely pathogenic | indel        | frameshift variant      | autosomal recessive comp. het.    | ENST00000589042.1:c.56330_56334 delTGAGA                |
| NGC00104_01 | <i>GK</i>      | likely pathogenic | SNV          | missense variant        | X-linked recessive                | ENST00000378943.3:c.1088C>A                             |
| NGC00109_01 | <i>TBCD</i>    | pathogenic        | indel        | splice acceptor variant | autosomal recessive comp. het.    | ENST00000539345.2:c.1150_1171 delATCGGTAGGATGGCTGGCAGGC |
| NGC00109_01 | <i>TBCD</i>    | likely pathogenic | SNV          | missense variant        | autosomal recessive comp. het.    | ENST00000539345.2:c.1589T>C                             |
| NGC00111_01 | <i>None</i>    | likely pathogenic | CNV          | deletion                | <i>de novo</i> autosomal dominant | chr5:96267459-120620855del                              |
| NGC00114_01 | <i>NDUFA6</i>  | likely pathogenic | indel        | frameshift variant      | autosomal recessive comp. het.    | ENST00000498737.2:c.433delC                             |
| NGC00114_01 | <i>NDUFA6</i>  | likely pathogenic | indel        | frameshift variant      | autosomal recessive comp. het.    | ENST00000498737.2:c.387delT                             |

|             |         |                   |               |                         |                                |                                           |
|-------------|---------|-------------------|---------------|-------------------------|--------------------------------|-------------------------------------------|
| NGC00125_01 | TGFBR1  | pathogenic        | SNV           | missense variant        | de novo autosomal dominant     | ENST00000552516.1:c.734C>T                |
| NGC00126_01 | RHOBTB2 | pathogenic        | SNV           | missense variant        | de novo autosomal dominant     | ENST00000519685.1:c.1448G>A               |
| NGC00127_01 | GFAP    | pathogenic        | SNV           | missense variant        | de novo autosomal dominant     | ENST00000586793.1:c.235C>T                |
| NGC00130_01 | PDHA1   | pathogenic        | SNV           | missense variant        | de novo X-linked dominant      | ENST00000379806.5:c.901C>G                |
| NGC00135_01 | SCN1A   | pathogenic        | SNV           | missense variant        | de novo autosomal dominant     | ENST00000303395.4:c.1178G>A               |
| NGC00138_01 | DNAH11  | pathogenic        | SNV           | stop gained             | autosomal recessive comp. het. | ENST00000328843.6:c.4348C>T               |
| NGC00138_01 | DNAH11  | vus               | SNV           | missense variant        | autosomal recessive comp. het. | ENST00000328843.6:c.10493G>A              |
| NGC00139_01 | ALS2    | pathogenic        | indel         | frameshift variant      | autosomal recessive comp. het. | ENST00000264276.6:c.1867_1868delCT        |
| NGC00139_01 | ALS2    | pathogenic        | SNV           | splice acceptor variant | autosomal recessive comp. het. | ENST00000264276.6:c.1738-1G>C             |
| NGC00143_01 | PYGM    | likely pathogenic | SNV           | missense variant        | autosomal recessive comp. het. | ENST00000164139.3:c.1160G>A               |
| NGC00143_01 | PYGM    | pathogenic        | SNV           | stop gained             | autosomal recessive comp. het. | ENST00000164139.3:c.148C>T                |
| NGC00144_01 | NPHS2   | pathogenic        | SNV           | missense variant        | autosomal recessive homozygous | ENST00000367615.4:c.413G>A                |
| NGC00147_01 | UBTF    | pathogenic        | SNV           | missense variant        | de novo autosomal dominant     | ENST00000302904.4:c.628G>A                |
| NGC00151_01 | KAT6B   | pathogenic        | indel         | frameshift variant      | de novo autosomal dominant     | ENST00000287239.4:c.3752_3759 delGAACAAAG |
| NGC00159_01 | FLNB    | pathogenic        | SNV           | missense variant        | de novo autosomal dominant     | ENST00000490882.1:c.5164G>A               |
| NGC00164_01 | CHD7    | pathogenic        | SNV           | splice acceptor variant | de novo autosomal dominant     | ENST00000423902.2:c.3990-1G>T             |
| NGC00170_01 | None    | pathogenic        | translocation | deletion                | de novo autosomal dominant     | chr7:155207859-159125030del               |
| NGC00174_01 | NDUFV1  | likely pathogenic | SNV           | missense variant        | autosomal recessive homozygous | ENST00000322776.6:c.1157G>A               |
| NGC00176_01 | SCN1A   | likely pathogenic | SNV           | missense variant        | de novo autosomal dominant     | ENST00000303395.4:c.4489G>A               |
| NGC00177_01 | PPP2R5D | likely pathogenic | SNV           | missense variant        | de novo autosomal dominant     | ENST00000485511.1:c.752A>T                |
| NGC00178_01 | DNM1    | likely pathogenic | SNV           | missense variant        | de novo autosomal dominant     | ENST00000372923.3:c.1076G>A               |
| NGC00191_01 | GNAO1   | likely pathogenic | indel         | in-frame deletion       | de novo autosomal dominant     | ENST00000262493.6:c.1021_1023 delGAC      |
| NGC00198_01 | CDKL5   | pathogenic        | SNV           | missense variant        | de novo X-linked dominant      | ENST00000379989.3:c.380A>T                |
| NGC00205_01 | MAP2K1  | likely pathogenic | SNV           | missense variant        | de novo autosomal dominant     | ENST00000307102.5:c.389A>G                |
| NGC00206_01 | DMD     | pathogenic        | SNV           | stop gained             | de novo X-linked recessive     | ENST00000357033.4:c.2137C>T               |

**Supplementary Table 6. Probands from the NICU grouped by phenotype similarity**

| Group | Diagnostic rate | Number of probands | Enriched phenotypes [# probands] <sup>a</sup>                                                                                                                                                                    | Diagnosed genes                       |
|-------|-----------------|--------------------|------------------------------------------------------------------------------------------------------------------------------------------------------------------------------------------------------------------|---------------------------------------|
| 1     | 100%            | 2                  | Hypertelorism [2], Talipes [2]                                                                                                                                                                                   | <i>COL2A1, FLNB</i>                   |
| 2     | 50%             | 4                  | None significant. Top hits <sup>b</sup> : Abnormal renal physiology [4], Abnormal urine output [3]                                                                                                               | <i>CYP21A2, NPHS2</i>                 |
| 3     | 50%             | 2                  | Abnormal heart valve morphology [2]                                                                                                                                                                              | <i>KAT6B</i>                          |
| 4     | 33%             | 3                  | Cleft palate [3], Micrognathia [2]                                                                                                                                                                               | 16Mb deletion                         |
| 5     | 25%             | 4                  | None significant. Top hits <sup>b</sup> : Polyhydramnios [3], Abnormal vascular physiology [3]                                                                                                                   | <i>TTN</i>                            |
| 6     | 20%             | 15                 | None significant. Top hits <sup>b</sup> : Abnormal morphology of the great vessels [15], Abnormal cardiac ventricle morphology [8]                                                                               | <i>NIPBL, CHD7</i> ,<br>24Mb deletion |
| 7     | 20%             | 5                  | Abnormality of nervous system physiology [5], Seizures [3], Feeding difficulties [3], Abnormality of muscle physiology [3]                                                                                       | <i>DNAH11</i>                         |
| 8     | 14%             | 7                  | None significant. Top hits <sup>b</sup> : Tachypnea [4], Tracheoesophageal fistula [4]                                                                                                                           | <i>MAP2K1</i>                         |
| 9     | 13%             | 8                  | Decreased body weight [8], Microcephaly [5]                                                                                                                                                                      | <i>MTM1</i>                           |
| 10    | 10%             | 10                 | Sepsis [10]                                                                                                                                                                                                      | <i>SATB2</i>                          |
| 11    | 0%              | 14                 | Abnormality of nervous system physiology [14], Abnormality of cation homeostasis [12], Encephalopathy [11], Seizures [11], Hyponatremia [8]. Hypotension [8], Hypoxic ischaemic encephalopathy <sup>c</sup> [11] | --                                    |
| 12    | 0%              | 13                 | None significant. Top hit <sup>b</sup> : Hyperglycemia [7]                                                                                                                                                       | --                                    |
| 13    | 0%              | 10                 | Abnormality of prenatal development or birth [10], Abnormality of the amniotic fluid [9]                                                                                                                         | --                                    |
| 14    | 0%              | 5                  | Meconium stained amniotic fluid [5], Aspiration [4]                                                                                                                                                              | --                                    |
| 15    | 0%              | 4                  | Ventriculomegaly [4], Absent septum pellucidum [4], Agenesis of corpus callosum [3], Abnormal cerebellum morphology [3]                                                                                          | --                                    |

<sup>a</sup> Phenotypes significantly enriched in group over cohort (Fisher's Exact test, FDR<0.1) and found in over half of the probands in the group. Simplified for ontology redundancy. <sup>b</sup> Most enriched term(s) in a group with no significantly enriched terms. <sup>c</sup> Hypoxic ischaemic encephalopathy (HIE) is not a term in HPO, but cases with suspected HIE are significantly enriched Group 11.



**Supplementary Table 7. Probands from the PICU grouped by phenotype similarity**

| Group | Diagnostic rate | Number of probands | Enriched phenotypes [# probands] <sup>a</sup>                                                                                  | Diagnosed genes                                |
|-------|-----------------|--------------------|--------------------------------------------------------------------------------------------------------------------------------|------------------------------------------------|
| 1     | 50%             | 4                  | None significant. Top hit <sup>b</sup> : Abnormality of the amniotic fluid [4]                                                 | <i>BRAF, RHOBTB2</i>                           |
| 2     | 50%             | 2                  | None significant. Top hit <sup>b</sup> : Lactic acidosis [2]                                                                   | <i>NDUFA6</i>                                  |
| 3     | 40%             | 5                  | Cerebral palsy [3]                                                                                                             | <i>SCN2A, COL2A1<sup>c</sup></i>               |
| 4     | 36%             | 11                 | Abnormality of body height [10], Abnormality of skull size [10], Short stature [8]                                             | <i>SMC1A, ARID1B, PPP2R5D, HBB<sup>c</sup></i> |
| 5     | 33%             | 3                  | Ventilator dependence with inability to wean [2]                                                                               | <i>PYGM</i>                                    |
| 6     | 25%             | 4                  | Congenital malformation of the great arteries [3]                                                                              | <i>TGFBR1</i>                                  |
| 7     | 22%             | 9                  | None significant. Top hits <sup>b</sup> : Feeding difficulties [7], Abnormal facial shape [5], Abnormality of eye movement [5] | <i>ASXL3, ARID1B</i>                           |
| 8     | 13%             | 15                 | Abnormality of immune system physiology [14], Sepsis [10], Respiratory tract infection [10]                                    | <i>DMD, GK</i>                                 |
| 9     | 0%              | 4                  | None significant. Top hit <sup>b</sup> : Functional respiratory abnormality [4]                                                | --                                             |
| 10    | 0%              | 2                  | Joint hypermobility [2]                                                                                                        | --                                             |
| 11    | 0%              | 2                  | Prolonged neonatal jaundice [2]                                                                                                | --                                             |

<sup>a</sup> Phenotypes significantly enriched in group over cohort (Fisher's Exact test, FDR<0.1) and found in over half of the probands in the group. Simplified for ontology redundancy. <sup>b</sup> Most enriched term(s) in a group with no significantly enriched terms. <sup>c</sup> Gene partially explains phenotype.

# SUPPLEMENTARY FIGURES

## Supplementary Figure 1. Recruitment age and ward

a.

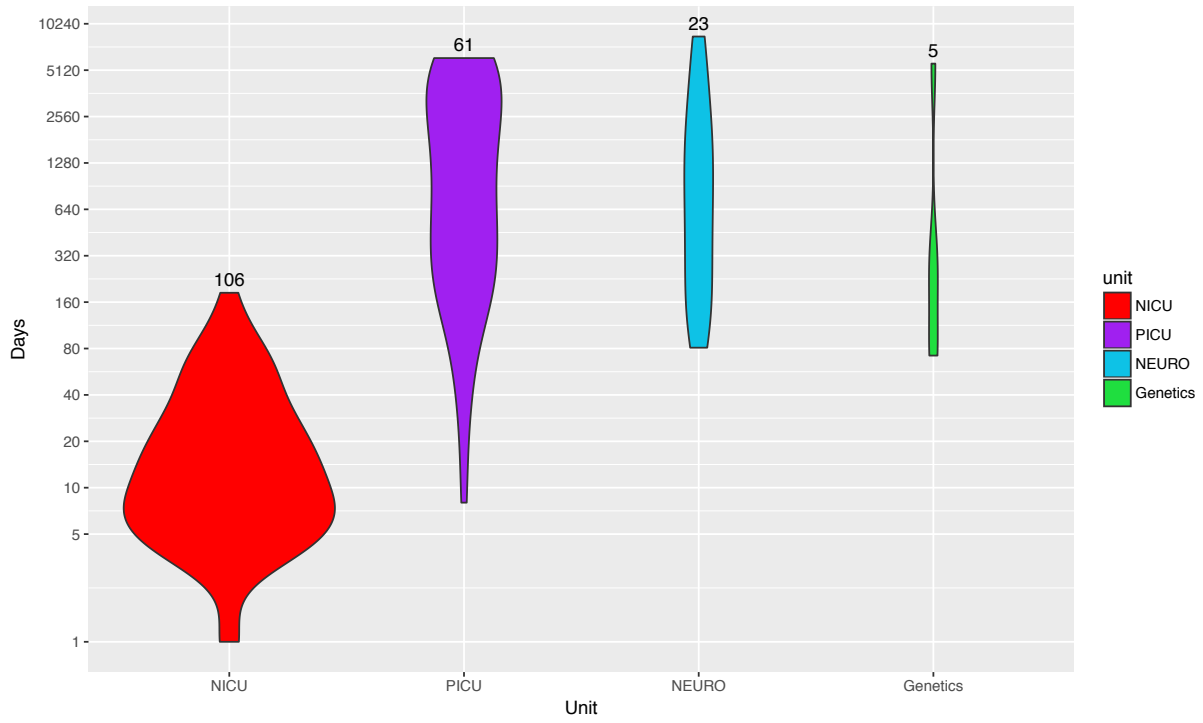

b.

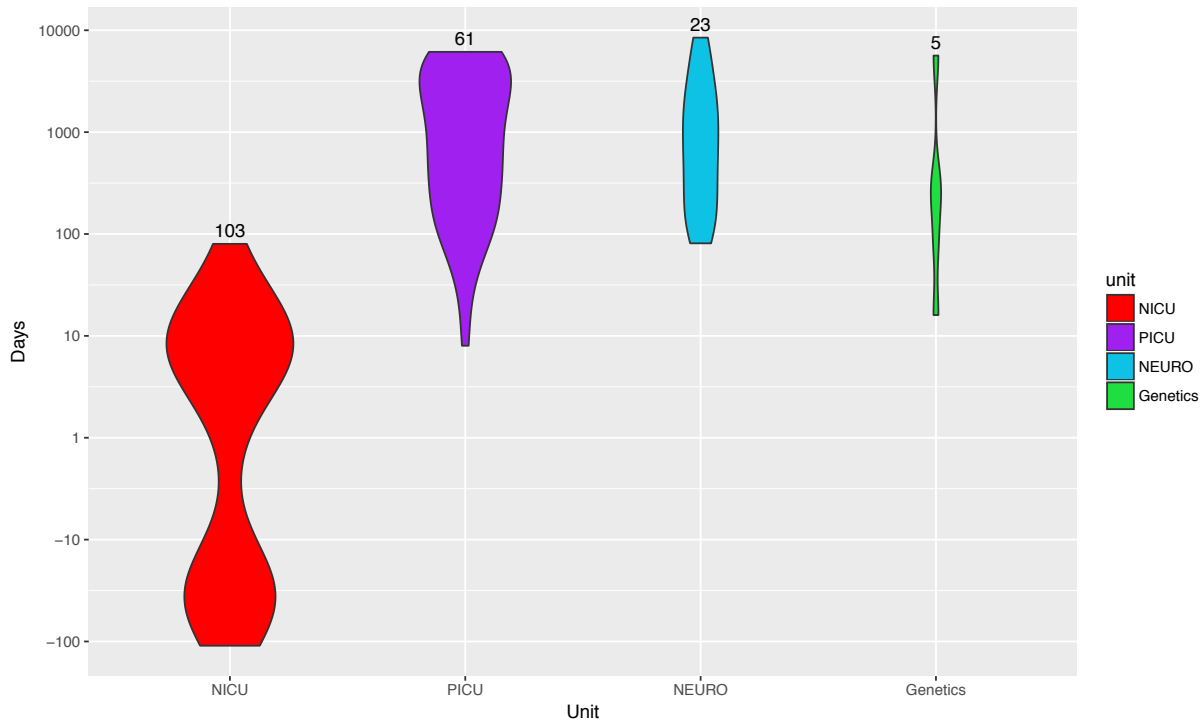

**Supp. Fig. 1** Violin plots showing distribution of age at recruitment in each ward for 195 families. The number above the plots is the number recruited from each ward. NICU: neonatal intensive care unit and 2 cases from delivery wards. PICU: paediatric intensive care unit. NEURO: paediatric neurology department. Genetics: clinical genetics department. **a.** days after birth, **b.** days from 40 week full term birth (3 probands were removed from NICU because gestational age information wasn't available)

### Supplementary Figure 2. Time to clinical diagnostic report

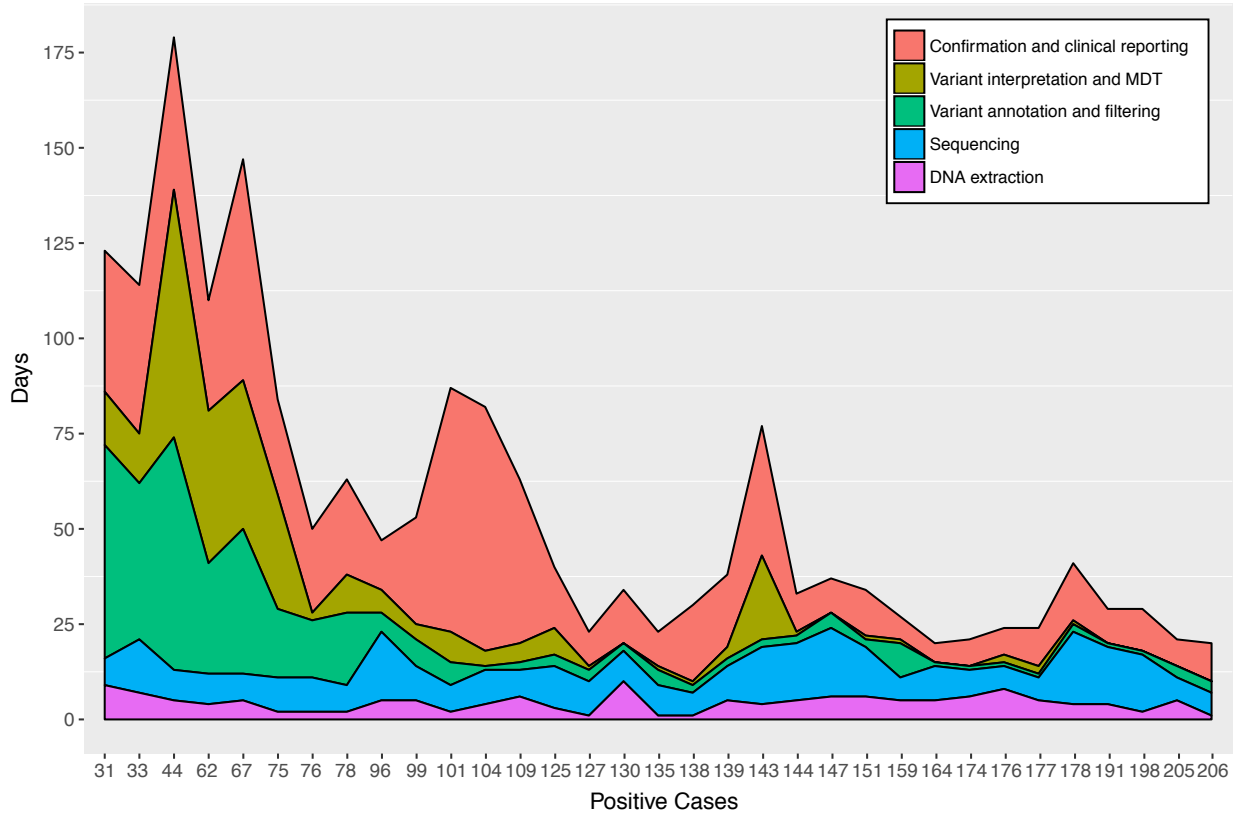

**Supp. Fig. 2** Stacked area chart showing the length of time in days for each step for positive cases. Note that confirmation and clinical reporting (red) and variant interpretation (gold) occasionally overlapped for difficult cases (e.g. 101). Not included are five cases where the variant was not originally reported through our study and two cases where diagnoses were made after subsequent re-analysis

### Supplementary Figure 3. Turnaround times

#### a. Consent date to all blood samples received

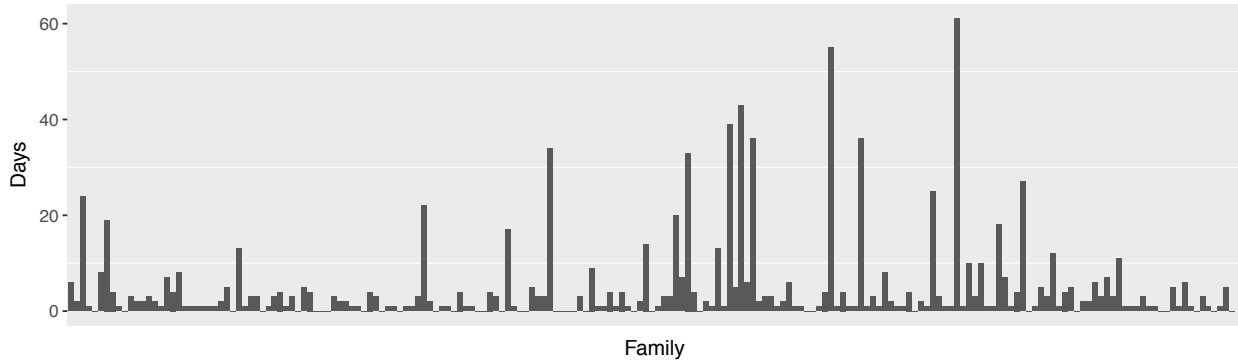

#### b. DNA extraction and processing

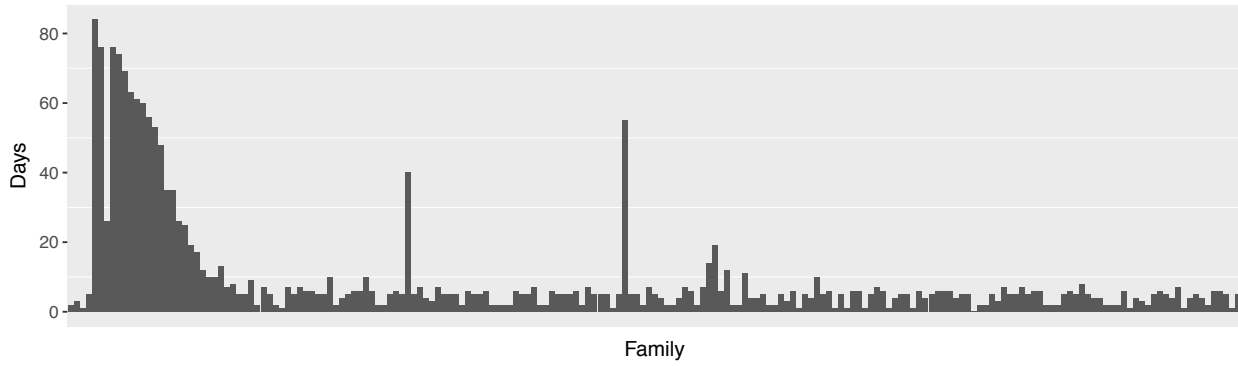

#### c. Sequencing and variant calling

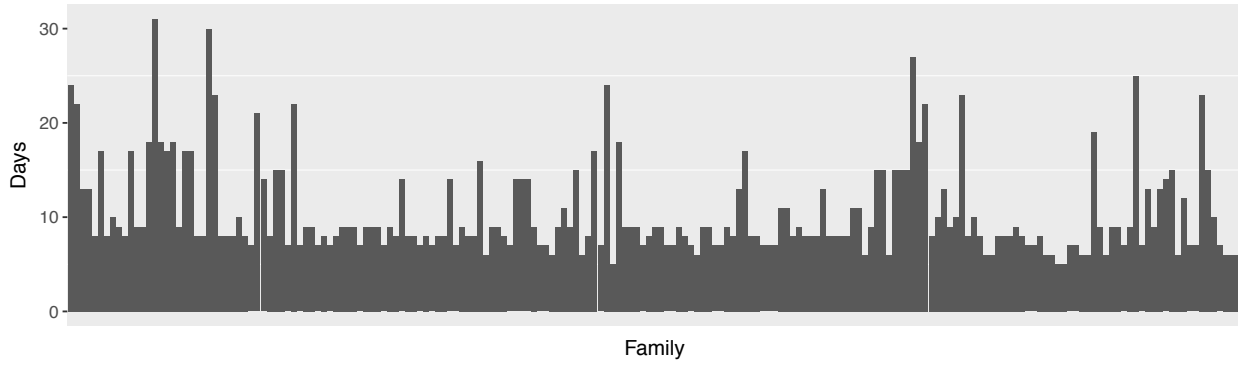

#### d. Data analysis

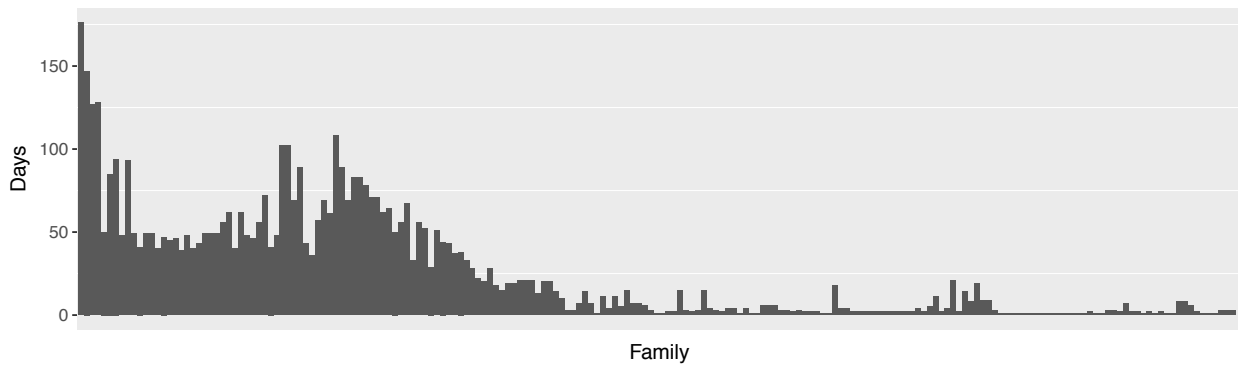

**e. Variant interpretation**

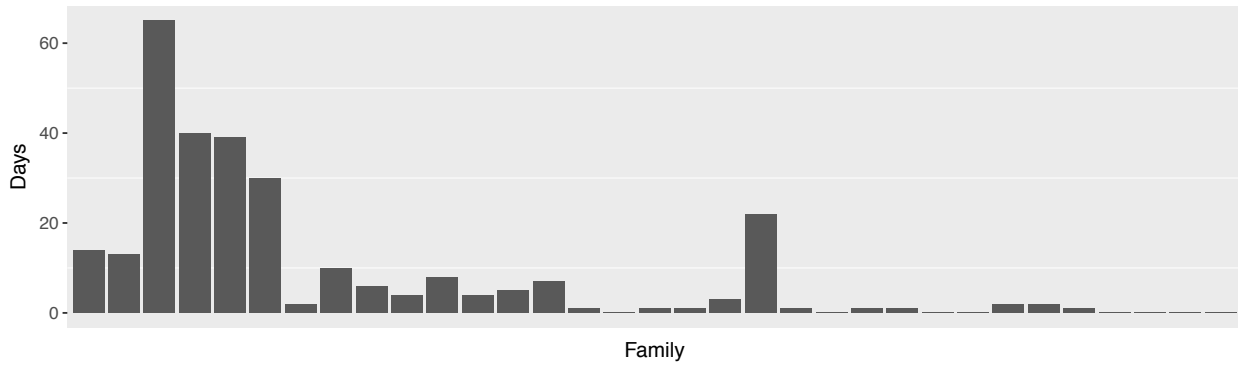

**f. Confirmation and clinical reporting**

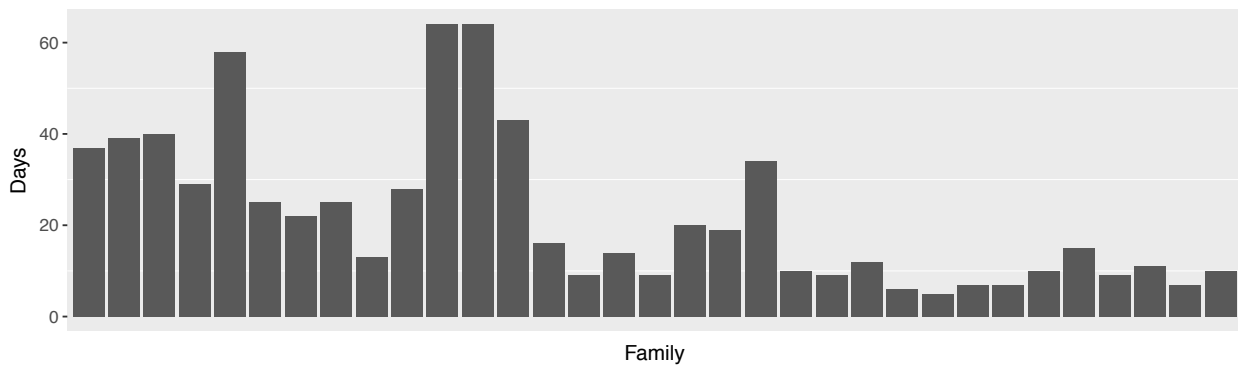

**Supp. Fig. 3** Bar plots of the turnaround times for each step for each family. a) Sample collection for all members of family. b) Sample processing, DNA extraction, quality control, and delivery to sequencing center. c) Sequencing and variant calling. d) Variant annotation, filtering, and review. e) Variant interpretation in multi-disciplinary team meetings (positive cases only). f) Variant confirmation, continuing interpretation, and diagnostic reporting (positive cases only). Note that variant interpretation (e) and confirmation and clinical reporting (f) occasionally overlapped for difficult cases

### Supplementary Figure 4. Number of HPO terms per proband

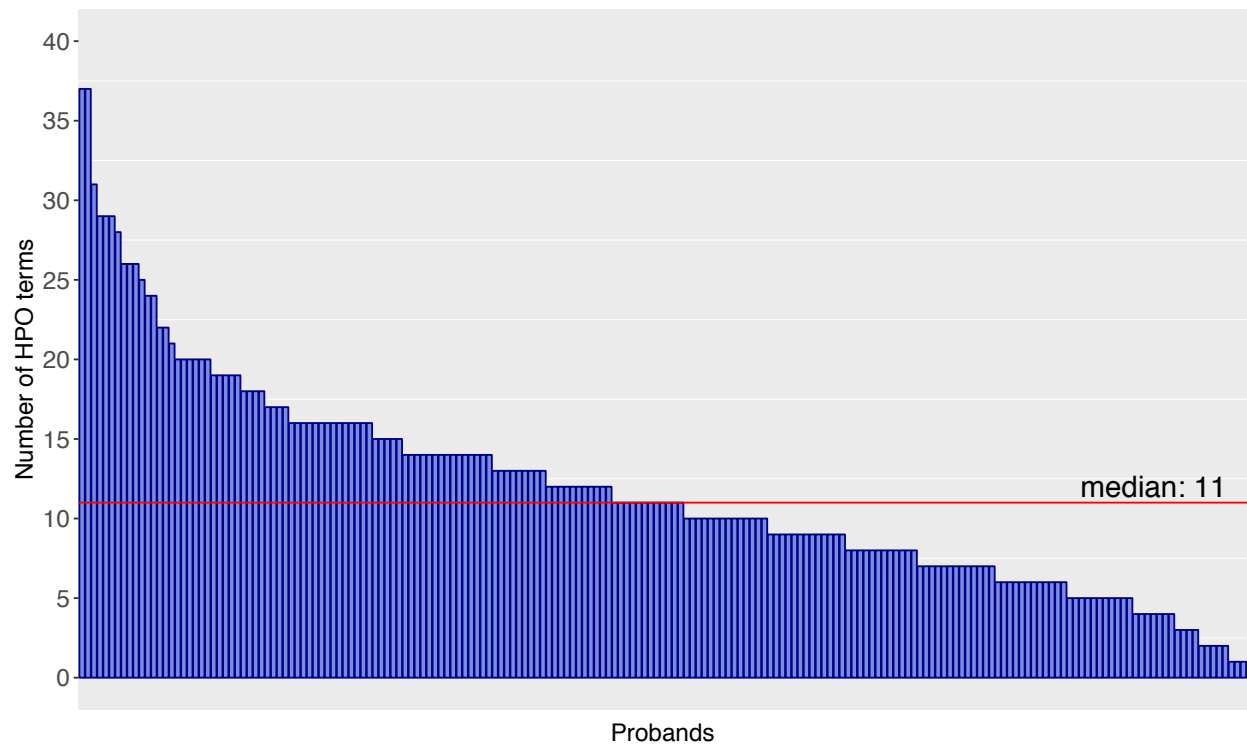

**Supp. Fig. 4** Number of non-redundant HPO terms assigned to each proband. These exclude maternal phenotypes, and those relating to birth (e.g. 'Premature birth', 'Abnormal birth'). Probands are ordered by number of terms

### Supplementary Figure 5. Number of probands with phenotypes in the major subclasses

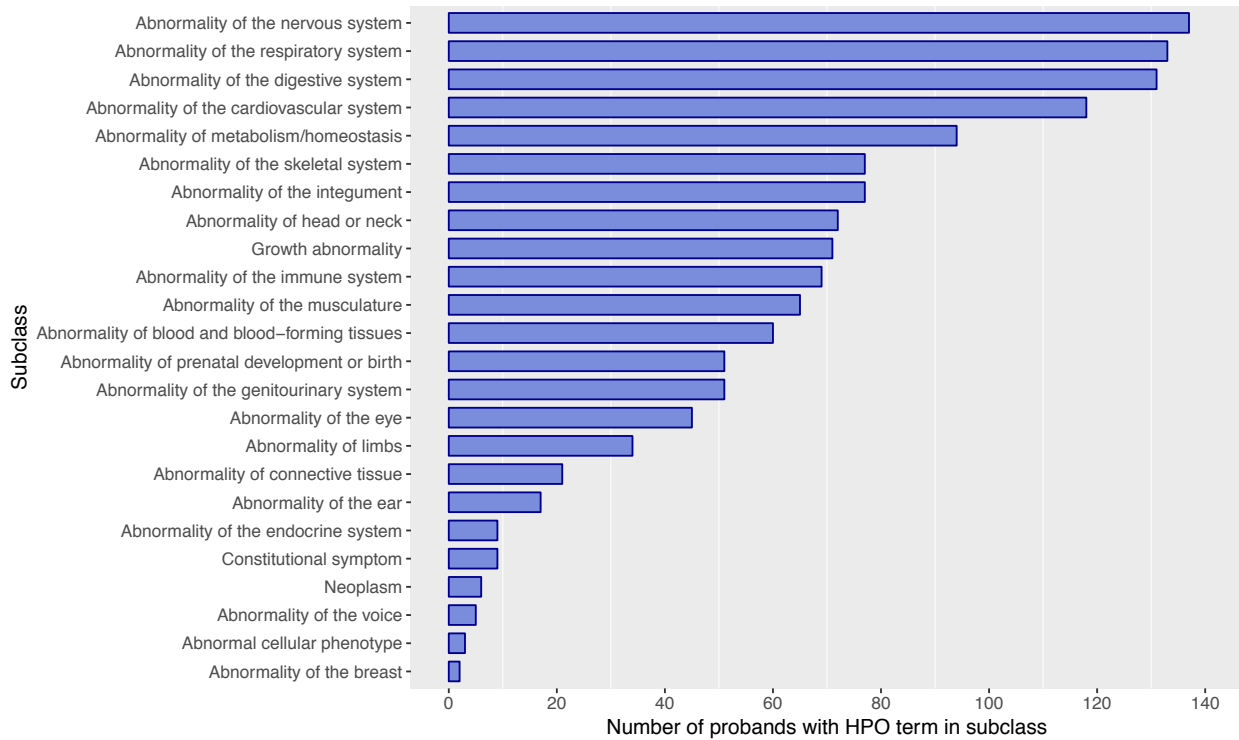

**Supp. Fig. 5** Number of probands with at least one HPO term for each class. The classes are the children terms of the HPO term ‘Phenotypic abnormality’



## Supplementary Figure 6. Probands from the NICU grouped by phenotype similarity

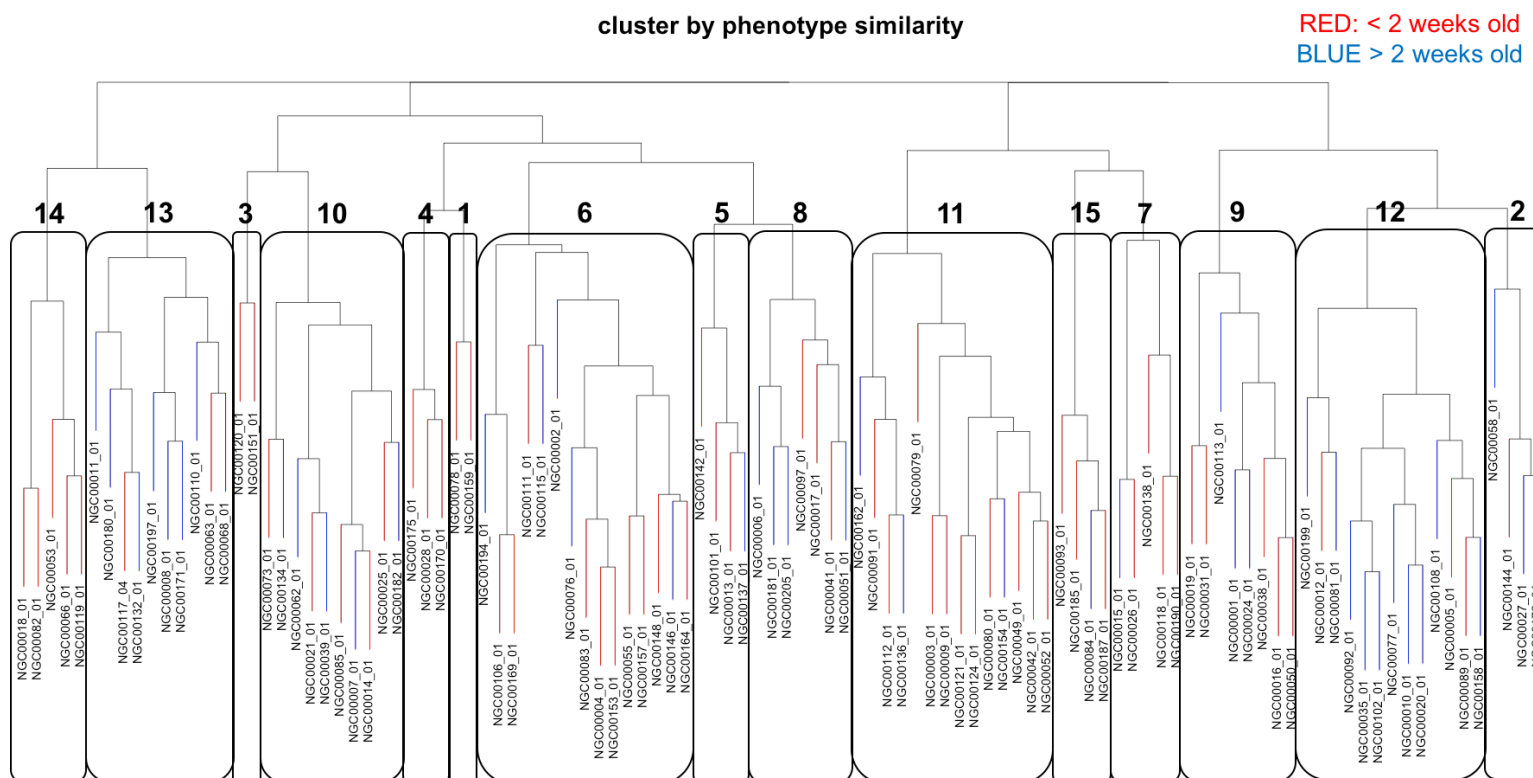

**Supp. Fig 6.** Probands from the neonatal intensive care unit (NICU) were hierarchically clustered by the semantic similarity score of their HPO term profiles and divided into 15 groups. Group numbers match those in Table 2 and Supplementary Table 6. Leaves are colored by the proband's age at recruitment (red: less than 2 weeks old; blue: over 2 weeks old)

## Supplementary Figure 7. Probands from the PICU grouped by phenotype similarity

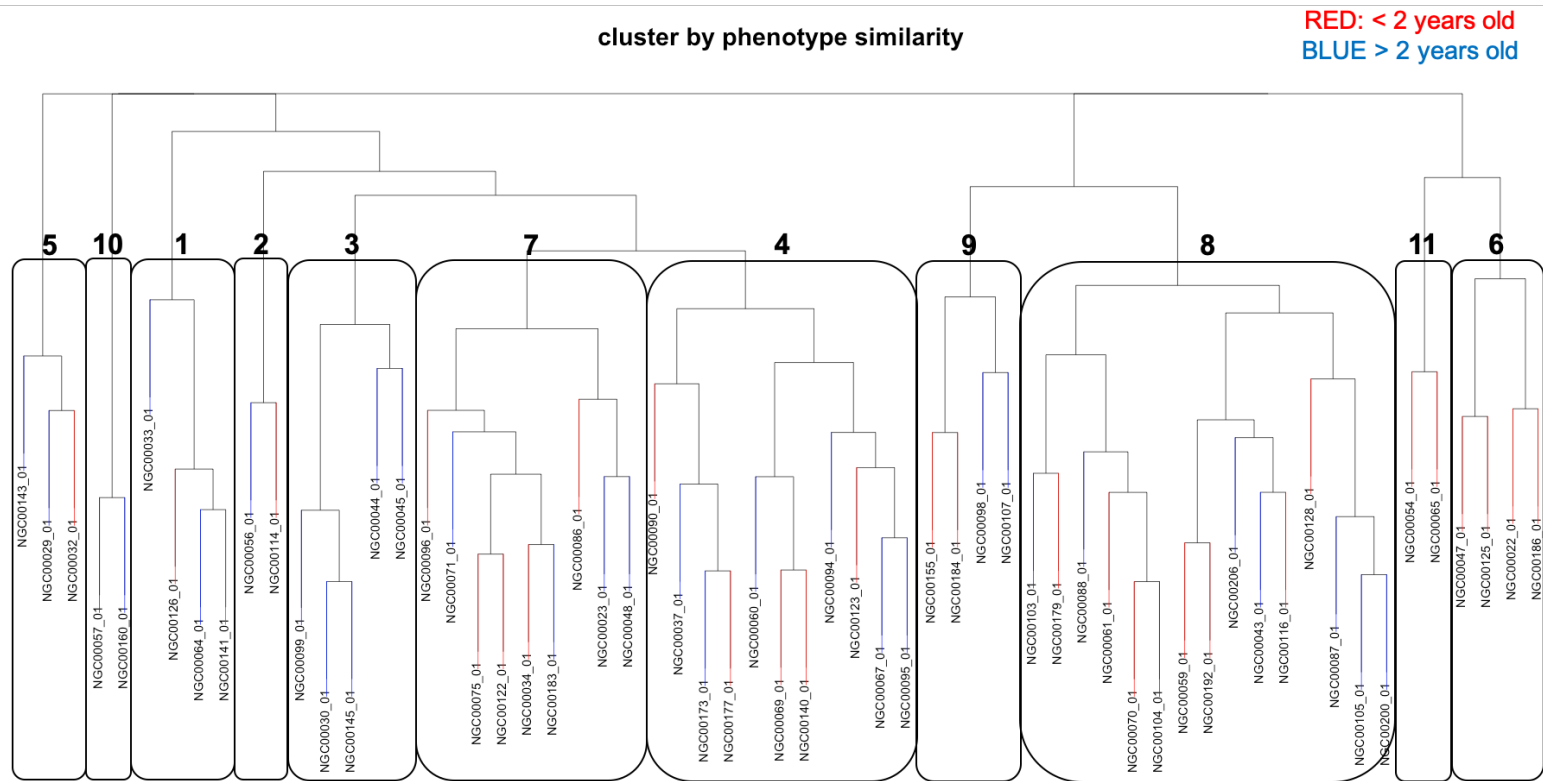

**Supp. Fig. 7** Probands from the paediatric intensive care unit (PICU) were hierarchically clustered by the semantic similarity score of their HPO term profiles and divided into 11 groups. Group numbers match those in Table 2 and Supplementary Table 7. Leaves are colored by the proband's age at recruitment (red: less than 2 years old; blue: over 2 years old)

## Supplementary Figure 8. Correlation between diagnosed gene similarity rank and number of HPO terms

### a. Number of proband's HPO terms vs diagnosed gene rank in similarity to proband

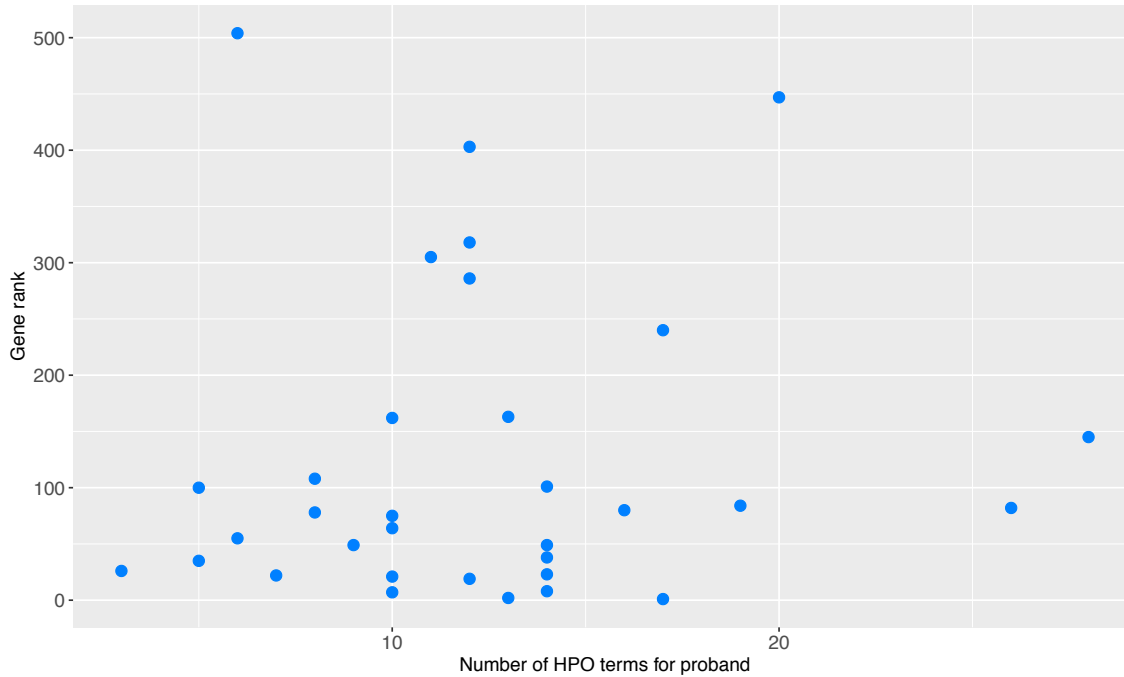

Number of non-redundant HPO terms assigned to each proband plotted against where the diagnosed gene ranked in phenotype similarity score to the proband compared to all HPO-typed genes in OMIM.

### b. Number of gene's HPO terms vs diagnosed gene rank in similarity to proband

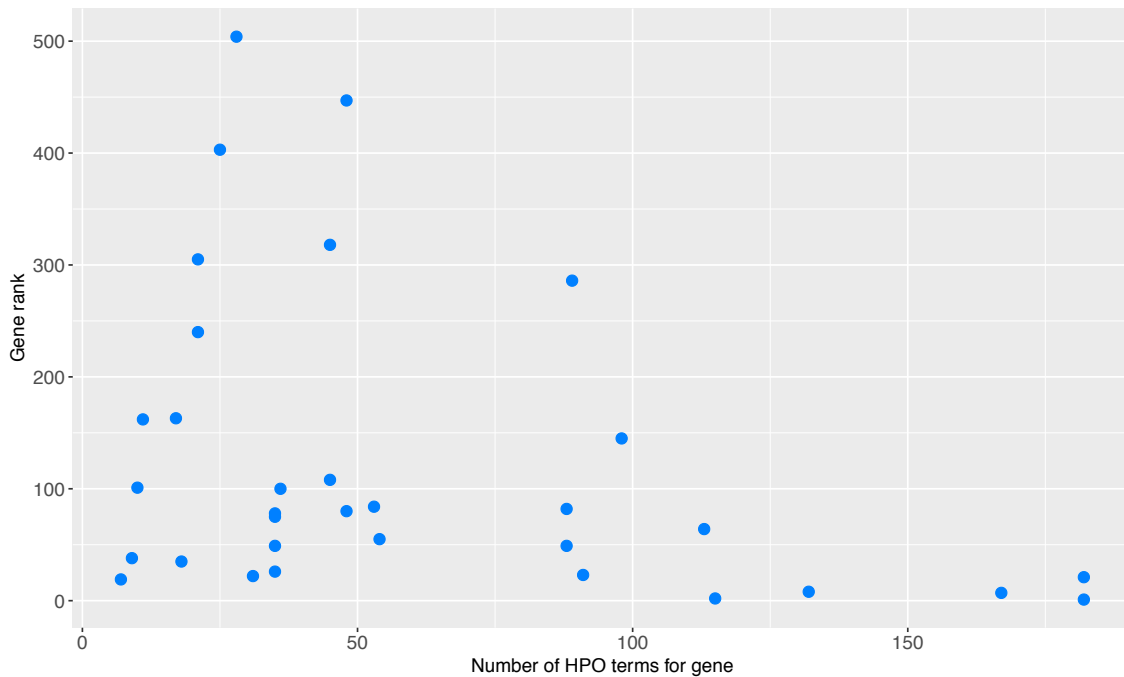

Number of non-redundant HPO terms associated with the diagnosed gene in OMIM plotted against where the diagnosed gene ranked in phenotype similarity score to the proband compared to all HPO-typed genes in OMIM.

## Supplementary Figure 9. Number of phenotypes for diagnosed and non-diagnosed cases

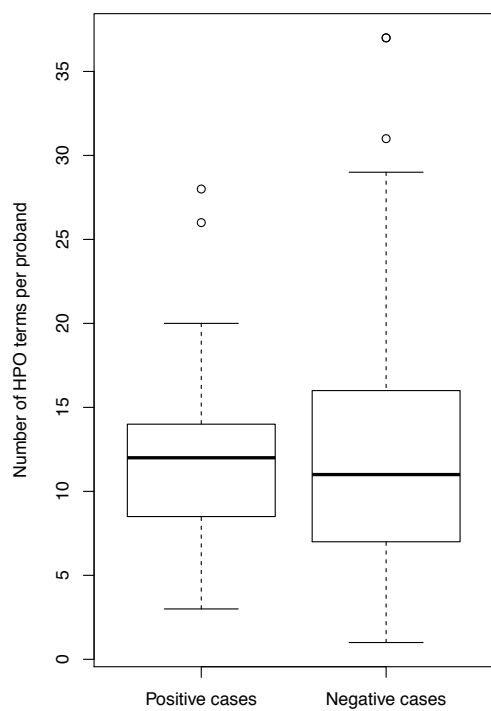

**Supp. Fig. 9** Boxplots of the number of HPO terms per proband for the 40 diagnoses cases (Positive cases) and the 155 cases for which we have not reported a genetic diagnosis (Negative cases). The positive case mean is 12.2 and the negative case mean is 11.7 (no significant increase for positive cases, Student's t-test  $p = 0.3422$ ). Bar: median (positive: 12, negative 11); Box: IQR (interquartile range, 25%-75%); Whiskers:  $\pm 1.58$  IQR/sqrt(n)
